# Supplementary material for: Association of Selected Area-Level Indicators With Suicide Mortality in Slovenian Municipalities
Source: Atypon-hosted journal article supplement (doi:10.1027/0227-5910/a000742), 2020-12-04
Supplement: 0227-5910_a000742_esm1.pdf [file 0227-5910_a000742_esm1.pdf]

Electronic Supplementary Material 1

*Pairwise robust coefficients of correlations between the suicide rate and different indicators at the level of municipalities (N = 212)*

| Indicators                                                                | 1    | 2    | 3    | 4    | 5    | 6    | 7    | 8    | 9    | 10   | 11   |
|---------------------------------------------------------------------------|------|------|------|------|------|------|------|------|------|------|------|
| 1 – Suicide rate                                                          | —    | -.02 | .15  | -.12 | -.33 | -.04 | .27  | .00  | -.01 | -.03 | .03  |
| 2 – Population size                                                       | -.02 | —    | -.10 | .07  | .42  | .04  | -.31 | .01  | .02  | .11  | -.02 |
| 3 – Percentage of male inhabitants                                        | .15  | -.10 | —    | .06  | -.23 | .06  | .15  | -.11 | .01  | .15  | -.07 |
| 4 – Number of marriages per 1,000 inhabitants                             | -.12 | .07  | .06  | —    | .11  | -.02 | .21  | .05  | -.03 | .21  | -.21 |
| 5 – Number of divorces per 1,000 inhabitants                              | -.33 | .42  | -.23 | .11  | —    | .15  | -.41 | .09  | -.07 | .01  | .04  |
| 6 – Percentage of people with low social support <sup>1</sup>             | -.04 | .04  | .06  | -.02 | .15  | —    | -.10 | .12  | .05  | .10  | .13  |
| 7 – Percentage of people with high neighborhood cohesion <sup>2</sup>     | .27  | -.31 | .15  | .21  | -.41 | -.10 | —    | -.01 | -.01 | -.43 | .23  |
| 8 – Percentage of people with risky single-occasion drinking <sup>3</sup> | .00  | .01  | -.11 | .05  | .09  | .12  | -.01 | —    | -.07 | .11  | -.04 |
| 9 – Percentage of people with a low level of education                    | -.01 | .02  | .01  | -.03 | -.07 | .05  | -.01 | -.07 | —    | -.03 | .13  |
| 10 – Percentage of active population                                      | -.03 | .11  | .15  | .21  | .01  | .10  | -.43 | .11  | -.03 | —    | -.56 |
| 11 – Percentage of the unemployed                                         | .03  | -.02 | -.07 | -.21 | .04  | .13  | .23  | -.04 | .13  | -.56 | —    |
| 12 – Net income per capita (EUR)                                          | -.10 | .10  | -.14 | .14  | .21  | -.13 | -.01 | .09  | .34  | .00  | -.30 |
| 13 – Number of sick leave days per capita                                 | .21  | .06  | .29  | -.06 | -.15 | -.04 | .13  | -.12 | -.03 | -.07 | .26  |
| 14 – Number of sick leave days due to mental condition per capita         | .10  | .07  | -.01 | -.18 | .09  | -.01 | -.04 | -.03 | .17  | -.11 | .12  |

|                                                            |      |      |      |      |      |     |      |      |      |      |     |
|------------------------------------------------------------|------|------|------|------|------|-----|------|------|------|------|-----|
| 15 – Number of No5B takers per 1,000 inhabitants           | .01  | .00  | -.06 | -.39 | -.27 | .04 | .31  | -.13 | -.03 | -.62 | .67 |
| 16 – Number of No6A takers per 1,000 inhabitants           | .15  | -.30 | .02  | -.16 | -.31 | .18 | .17  | -.01 | .11  | -.33 | .25 |
| 17 – Number of general practitioners per 1,000 inhabitants | -.04 | .55  | -.10 | -.05 | .28  | .11 | -.30 | -.07 | .35  | -.17 | .19 |

<sup>1/2/3</sup>Data missing for 12/1/2 municipalities.

ESM 1 – Continued

| Indicators                                                                | 12   | 13   | 14   | 15   | 16   | 17   |
|---------------------------------------------------------------------------|------|------|------|------|------|------|
| 1 – Suicide rate                                                          | -.10 | .21  | .10  | .01  | .15  | -.04 |
| 2 – Population size                                                       | .10  | .06  | .07  | .00  | -.30 | .55  |
| 3 – Percentage of male inhabitants                                        | -.14 | .29  | -.01 | -.06 | .02  | -.10 |
| 4 – Number of marriages per 1,000 inhabitants                             | .14  | -.06 | -.18 | -.39 | -.16 | -.05 |
| 5 – Number of divorces per 1,000 inhabitants                              | .21  | -.15 | .09  | -.27 | -.31 | .28  |
| 6 – Percentage of people with low social support <sup>1</sup>             | -.13 | -.04 | -.01 | .04  | .18  | .11  |
| 7 – Percentage of people with high neighborhood cohesion <sup>2</sup>     | -.01 | .13  | -.04 | .31  | .17  | -.30 |
| 8 – Percentage of people with risky single-occasion drinking <sup>3</sup> | .09  | -.12 | -.03 | -.13 | -.01 | -.07 |
| 9 – Percentage of people with a low level of education                    | .34  | -.03 | .17  | -.03 | .11  | .35  |
| 10 – Percentage of active population                                      | .00  | -.07 | -.11 | -.62 | -.33 | -.17 |
| 11 – Percentage of the unemployed                                         | -.30 | .26  | .12  | .67  | .25  | .19  |

|                                                                   |      |      |     |      |      |     |
|-------------------------------------------------------------------|------|------|-----|------|------|-----|
| 12 – Net income per capita (EUR)                                  | —    | -.31 | .01 | -.26 | -.30 | .09 |
| 13 – Number of sick leave days per capita                         | -.31 | —    | .60 | .32  | .33  | .04 |
| 14 – Number of sick leave days due to mental condition per capita | .01  | .60  | —   | .21  | .39  | .13 |
| 15 – Number of No5B takers per 1,000 inhabitants                  | -.26 | .32  | .21 | —    | .55  | .15 |
| 16 – Number of No6A takers per 1,000 inhabitants                  | -.30 | .33  | .39 | .55  | —    | .03 |
| 17 – Number of general practitioners per 1,000 inhabitants        | .09  | .04  | .13 | .15  | .03  | —   |

---
